# Supplementary material
Source: Research Square preprint supplement (doi:10.21203/rs.3.rs-10156948/v1)
Supplement: Supplementary file 1 [file b4c162e29429f0917b5891e3.docx]

Taxonomic and functional representations of phytoplankton beta diversity show contrasting sensitivity to environmental gradients in a tropical reservoir

Alfonso Pineda1 & Luzia Cleide Rodrigues2,3

1 Escuela de Biología, Universidad Industrial de Santander (UIS), Bucaramanga, Colombia

2 Programa de Pós-graduação em Ecologia de Ambientes Aquáticos Continentais – PEA, Universidade Estadual de Maringá – UEM, Maringá, PR, Brazil

3 Núcleo de Pesquisas em Limnologia e Aquicultura – Nupélia, Universidade Estadual de Maringá – UEM, Maringá, PR, Brazil

**Table S1**Species richness for each one Reynolds functional group (RFG).

| **RFG** | **Species Richness** |  | **RFG** | **Species Richness** |
| --- | --- | --- | --- | --- |
| MP | 12 |  | S1 | 5 |
| J | 34 |  | E | 3 |
| F | 38 |  | M | 2 |
| X1 | 14 |  | D | 3 |
| K | 3 |  | X3 | 2 |
| C | 2 |  | SN | 1 |
| P | 5 |  | Z | 1 |
| X2 | 1 |  | A | 4 |
| L0 | 6 |  | W1 | 6 |
| Y | 8 |  | H1 | 3 |
| N | 23 |  | **Total** | 176 |

**Table S2** Selected variables for each sampling campaign and dbRDA results. “--”, cases without selected variables

| **Beta** | **Measure** | **Sampling** | **r2** | **r2adjust** | **Variables** | **F** | **P** |
| --- | --- | --- | --- | --- | --- | --- | --- |
| Total | mFD.index | Rainy1 | 25.19 | 12.73 | PSR | 2.02 | 0.041 |
| Total | mFD.index | Rainy2 | 16.35 | 9.38 | DIN | 2.35 | 0.012 |
| Total | mFD.index | Rainy3 | 24.36 | 14.90 | ZeuZmax | 2.58 | 0.005 |
| Total | mFD.index | Dry1 | 30.66 | 15.25 | Zmax + TR | 2.07 | 0.009 |
| Total | mFD.index | Dry2 | 18.12 | 11.30 | O2 | 2.66 | 0.019 |
| Total | mFD.index | Dry3 | 41.58 | 24.88 | DIN, pH | 2.49 | 0.007 |
| Total | FG.biovol | Rainy1 | 42.61 | 28.26 | ZmixZmax + ZeuZmax | 2.97 | 0.001 |
| Total | FG.biovol | Rainy2 | 15.87 | 8.85 | ZmixZmax | 2.26 | 0.011 |
| Total | FG.biovol | Rainy3 | 42.5 | 32.05 | TR + ZmixZmax | 4.07 | 0.001 |
| Total | FG.biovol | Dry1 | 30.56 | 15.12 | cond + ZmixZmax | 1.98 | 0.001 |
| Total | FG.biovol | Dry2 | 16.87 | 9.95 | ZeuZmax | 2.44 | 0.012 |
| Total | FG.biovol | Dry3 | 24.07 | 17.74 | DIN | 3.80 | 0.002 |
| Total | FG.occu | Rainy1 | 27.79 | 19.76 | ZmixZmax | 3.46 | 0.005 |
| Total | FG.occu | Rainy2 | 22.93 | 16.51 | ZmixZmax | 3.57 | 0.001 |
| Total | FG.occu | Rainy3 | 32.54 | 26.92 | TR | 5.79 | 0.001 |
| Total | FG.occu | Dry1 | 33.17 | 18.31 | Zmax + DIN | 2.23 | 0.001 |
| Total | FG.occu | Dry2 | 0 | 0 | -- | 0.00 | 0 |
| Total | FG.occu | Dry3 | 14.19 | 7.04 | DIN | 1.98 | 0.039 |
| Total | sp.biovol | Rainy1 | 19.69 | 10.76 | ZmixZmax | 2.21 | 0.002 |
| Total | sp.biovol | Rainy2 | 24.61 | 10.90 | ZmixZmax + ZeuZmax | 1.80 | 0.001 |
| Total | sp.biovol | Rainy3 | 38.74 | 27.60 | TR + ZmixZmax | 3.48 | 0.001 |
| Total | sp.biovol | Dry1 | 30.7 | 15.30 | pH + temp | 1.99 | 0.002 |
| Total | sp.biovol | Dry2 | 30.37 | 17.70 | ZeuZmax + DIN | 2.40 | 0.001 |
| Total | sp.biovol | Dry3 | 20.72 | 14.11 | DIN | 3.14 | 0.001 |
| Total | sp.occu | Rainy1 | 32.27 | 15.33 | Zmax + ZmixZmax | 1.91 | 0.002 |
| Total | sp.occu | Rainy2 | 21.61 | 15.08 | ZmixZmax | 3.31 | 0.001 |
| Total | sp.occu | Rainy3 | 32.87 | 20.67 | TR + temp | 2.69 | 0.001 |
| Total | sp.occu | Dry1 | 31.05 | 15.72 | TR + DIN | 2.03 | 0.001 |
| Total | sp.occu | Dry2 | 19.07 | 12.32 | ZmixZmax | 2.83 | 0.002 |
| Total | sp.occu | Dry3 | 21.15 | 14.57 | DIN | 3.22 | 0.001 |
| Total | bFD.index.occu | Rainy1 | 29.83 | 22.03 | ZmixZmax | 3.83 | 0.005 |
| Total | bFD.index.occu | Rainy2 | 17.54 | 10.67 | pH | 2.55 | 0.001 |
| Total | bFD.index.occu | Rainy3 | 28.05 | 22.05 | Zmax | 4.68 | 0.004 |
| Total | bFD.index.occu | Dry1 | 33.92 | 19.23 | ZmixZmax + DIN | 2.31 | 0.001 |
| Total | bFD.index.occu | Dry2 | 20.12 | 13.46 | DC | 3.02 | 0.003 |
| Total | bFD.index.occu | Dry3 | 24.15 | 17.83 | DIN | 3.82 | 0.011 |
| Total | bFD.index.biovol | Rainy1 | 38.76 | 23.45 | ZmixZmax + zeuzmax | 2.53 | 0.001 |
| Total | bFD.index.biovol | Rainy2 | 14.82 | 7.73 | ZmixZmax | 2.09 | 0.022 |
| Total | bFD.index.biovol | Rainy3 | 24.17 | 17.86 | ZmixZmax | 3.83 | 0.001 |
| Total | bFD.index.biovol | Dry1 | 38.16 | 24.41 | pH + ZmixZmax | 2.78 | 0.001 |
| Total | bFD.index.biovol | Dry2 | 0 | 0.00 | -- | 0.00 | 0 |
| Total | bFD.index.biovol | Dry3 | 26.33 | 20.19 | DIN | 4.29 | 0.004 |
| Turnover | mFD.index | Rainy1 | 27.14 | 14.99 | o2 | 2.23 | 0.009 |
| Turnover | mFD.index | Rainy2 | 0 | 0 | -- | 0.00 | 0 |
| Turnover | mFD.index | Rainy3 | 24.03 | 14.54 | TR | 2.53 | 0.008 |
| Turnover | mFD.index | Dry1 | 29 | 13.21 | Zmax+ PSR | 1.84 | 0.003 |
| Turnover | mFD.index | Dry2 | 13.59 | 6.39 | pH | 1.89 | 0.003 |
| Turnover | mFD.index | Dry3 | 17.98 | 7.73 | pH | 1.75 | 0.016 |
| Turnover | FG.biovol | Rainy1 | 23.48 | 14.98 | ZmixZmax | 2.76 | 0.014 |
| Turnover | FG.biovol | Rainy2 | 23.38 | 9.45 | ZeuZmax + DIN | 1.68 | 0.001 |
| Turnover | FG.biovol | Rainy3 | 29.61 | 16.81 | Zmax + temp | 2.31 | 0.001 |
| Turnover | FG.biovol | Dry1 | 21.47 | 13.62 | Zmax | 2.73 | 0.001 |
| Turnover | FG.biovol | Dry2 | 12.38 | 5.1 | ZeuZmax | 1.70 | 0.006 |
| Turnover | FG.biovol | Dry3 | 0 | 0 |  | 0.00 | 0 |
| Turnover | FG.occu | Rainy1 | 18.63 | 9.58 | ZmixZmax | 2.06 | 0.026 |
| Turnover | FG.occu | Rainy2 | 17.97 | 11.12 | ZmixZmax | 2.63 | 0.001 |
| Turnover | FG.occu | Rainy3 | 17.71 | 10.86 | ZmixZmax | 2.58 | 0.004 |
| Turnover | FG.occu | Dry1 | 16.24 | 7.87 | Zmax | 1.94 | 0.006 |
| Turnover | FG.occu | Dry2 | 10.34 | 2.86 | Zmax | 1.38 | 0.061 |
| Turnover | FG.occu | Dry3 | 0 | 0 | ZmixZmax | 0.00 | 0 |
| Turnover | sp.biovol | Rainy1 | 29.93 | 12.41 | Zmax + ZmixZmax | 1.71 | 0.005 |
| Turnover | sp.biovol | Rainy2 | 20.89 | 14.29 | ZmixZmax | 3.17 | 0.001 |
| Turnover | sp.biovol | Rainy3 | 25.02 | 11.39 | Zmax + temp | 1.84 | 0.001 |
| Turnover | sp.biovol | Dry1 | 19.19 | 11.1 | TR | 2.37 | 0.001 |
| Turnover | sp.biovol | Dry2 | 21.78 | 15.27 | ZmixZmax | 3.34 | 0.001 |
| Turnover | sp.biovol | Dry3 | 12.24 | 4.92 | O2 | 1.67 | 0.006 |
| Turnover | sp.occu | Rainy1 | 32.32 | 15.4 | DC + pH | 1.91 | 0.001 |
| Turnover | sp.occu | Rainy2 | 20.89 | 14.29 | ZmixZmax | 3.17 | 0.001 |
| Turnover | sp.occu | Rainy3 | 34.3 | 14.59 | TR + temp + Zmax | 1.74 | 0.001 |
| Turnover | sp.occu | Dry1 | 19.19 | 11.1 | TR | 2.37 | 0.001 |
| Turnover | sp.occu | Dry2 | 21.78 | 15.27 | ZmixZmax | 3.34 | 0.001 |
| Turnover | sp.occu | Dry3 | 12.24 | 4.92 | O2 | 1.67 | 0.009 |
| Turnover | bFD.index.occu | Rainy1 | 18.73 | 9.7 | ZmixZmax | 2.07 | 0.009 |
| Turnover | bFD.index.occu | Rainy2 | 0 | 0 | -- | 0.00 | 0 |
| Turnover | bFD.index.occu | Rainy3 | 0 | 0 | -- | 0.00 | 0 |
| Turnover | bFD.index.occu | Dry1 | 15.6 | 7.16 | zmax | 1.85 | 0.004 |
| Turnover | bFD.index.occu | Dry2 | 22.77 | 8.7 | Zmax + ZmixZmax | 1.62 | 0.001 |
| Turnover | bFD.index.occu | Dry3 | 9.33 | 1.78 | DC | 1.24 | 0.094 |
| Turnover | bFD.index.biovol | Rainy1 | 18.7 | 9.66 | ZmixZmax | 2.07 | 0.004 |
| Turnover | bFD.index.biovol | Rainy2 | 10.6 | 3.15 | ZmixZmax | 1.42 | 0.004 |
| Turnover | bFD.index.biovol | Rainy3 | 12.44 | 5.14 | ZmixZmax | 1.71 | 0.018 |
| Turnover | bFD.index.biovol | Dry1 | 12.23 | 3.45 | PSR | 1.39 | 0.012 |
| Turnover | bFD.index.biovol | Dry2 | 10.83 | 3.4 | zmax | 1.46 | 0.019 |
| Turnover | bFD.index.biovol | Dry3 | 0 | 0 | -- | 0.00 | 0 |
| Richness.Dif | mFD.index | Rainy1 | 0 | 0 | -- | 0.00 | 0 |
| Richnes.Dif | mFD.index | Rainy2 | 24.05 | 10.24 | ZmixZmax + DIN | 1.74 | 0.008 |
| Richnes.Dif | mFD.index | Rainy3 | 0 | 0 |  | 0.00 | 0 |
| Richnes.Dif | mFD.index | Dry1 | 11.5 | 2.65 | O2 | 1.30 | 0.087 |
| Richnes.Dif | mFD.index | Dry2 | 0 | 0 | -- | 0.00 | 0 |
| Richnes.Dif | mFD.index | Dry3 | 38.27 | 30.56 | -- | 4.96 | 0.005 |
| Richnes.Dif | FG.biovol | Rainy1 | 15.41 | 6 | ZeuZmax | 1.64 | 0.004 |
| Richnes.Dif | FG.biovol | Rainy2 | 0 | 0 | -- | 0.00 | 0 |
| Richnes.Dif | FG.biovol | Rainy3 | 0 | 0 | -- | 0.00 | 0 |
| Richnes.Dif | FG.biovol | Dry1 | 0 | 0 | -- | 0.00 | 0 |
| Richnes.Dif | FG.biovol | Dry2 | 10.39 | 2.92 | ZmixZmax | 1.39 | 0.071 |
| Richnes.Dif | FG.biovol | Dry3 | 12.61 | 5.33 | Zmax | 1.73 | 0.009 |
| Richnes.Dif | FG.occu | Rainy1 | 0 | 0 | -- | 0.00 | 0 |
| Richnes.Dif | FG.occu | Rainy2 | 0 | 0 | -- | 0.00 | 0 |
| Richnes.Dif | FG.occu | Rainy3 | 0 | 0 | -- | 0.00 | 0 |
| Richnes.Dif | FG.occu | Dry1 | 0 | 0 | -- | 0.00 | 0 |
| Richnes.Dif | FG.occu | Dry2 | 10.38 | 2.91 | DIN | 1.39 | 0.078 |
| Richnes.Dif | FG.occu | Dry3 | 0 | 0 | -- | 0.00 | 0 |
| Richnes.Dif | sp.biovol | Rainy1 | 12.77 | 3.1 | ZeuZmax | 1.32 | 0.058 |
| Richnes.Dif | sp.biovol | Rainy2 | 0 | 0 | -- | 0.00 | 0 |
| Richnes.Dif | sp.biovol | Rainy3 | 0 | 0 | -- | 0.00 | 0 |
| Richnes.Dif | sp.biovol | Dry1 | 14.8 | 6.27 | O2 | 1.74 | 0.001 |
| Richnes.Dif | sp.biovol | Dry2 | 0 | 0 | -- | 0.00 | 0 |
| Richnes.Dif | sp.biovol | Dry3 | 11.88 | 4.54 | zmax | 1.62 | 0.019 |
| Richnes.Dif | sp.occu | Rainy1 | 0 | 0 | -- | 0.00 | 0 |
| Richnes.Dif | sp.occu | Rainy2 | 11.13 | 3.72 | O2 | 1.50 | 0.049 |
| Richnes.Dif | sp.occu | Rainy3 | 0 | 0 | -- | 0.00 | 0 |
| Richnes.Dif | sp.occu | Dry1 | 12.41 | 3.66 | O2 | 1.42 | 0.062 |
| Richnes.Dif | sp.occu | Dry2 | 0 | 0 | -- | 0.00 | 0 |
| Richnes.Dif | sp.occu | Dry3 | 0 | 0 | -- | 0.00 | 0 |
| Richnes.Dif | bFD.index.occu | Rainy1 | 0 | 0 | -- | 0.00 | 0 |
| Richnes.Dif | bFD.index.occu | Rainy2 | 34.7 | 29.26 | DIN | 6.38 | 0.002 |
| Richnes.Dif | bFD.index.occu | Rainy3 | 36.67 | 25.15 | Zmax + DC | 3.19 | 0.007 |
| Richnes.Dif | bFD.index.occu | Dry1 | 22.73 | 15 | DIN | 2.94 | 0.029 |
| Richnes.Dif | bFD.index.occu | Dry2 | 0 | 0 | -- | 0.00 | 0 |
| Richnes.Dif | bFD.index.occu | Dry3 | 26.84 | 20.74 | DIN | 4.40 | 0.021 |
| Richnes.Dif | bFD.index.biovol | Rainy1 | 0 | 0 | -- | 0.00 | 0 |
| Richnes.Dif | bFD.index.biovol | Rainy2 | 0 | 0 | -- | 0.00 | 0 |
| Richnes.Dif | bFD.index.biovol | Rainy3 | 0 | 0 | -- | 0.00 | 0 |
| Richnes.Dif | bFD.index.biovol | Dry1 | 35.51 | 28.95 | pH | 5.48 | 0.001 |
| Richnes.Dif | bFD.index.biovol | Dry2 | 0 | 0 | -- | 0.00 | 0 |
| Richnes.Dif | bFD.index.biovol | Dry3 | 30.22 | 24.4 | DIN | 5.20 | 0.003 |

**Table S3** Pairwise comparisons among dissimilarity measures for beta-diversity components and adjusted R² during the rainy season. Results are based on estimated marginal means (emmeans) from GLMs (beta regression). Parameter indicates whether the response is beta-diversity values (“Diversity”) or environmental explanation (“R² Adjusted”). Estimate is the difference in marginal means (first minus second measure); SE = standard error; df = degrees of freedom; t.ratio = test statistic; p.value = p-values adjusted for multiple comparisons in emmeans. Significant differences (p < 0.05) are highlighted in bold.

| Parameter | Beta diversity component | contrast | estimate | SE | df | t.ratio | p.value |
| --- | --- | --- | --- | --- | --- | --- | --- |
| Diversity | Total | **bFD.index.biovol - bFD.index.occu** | **1.130** | **0.138** | **12** | **8.18** | **<.0001** |
|  |  | bFD.index.biovol - FG.biovol | -0.386 | 0.158 | 12 | -2.45 | 0.259 |
|  |  | **bFD.index.biovol - FG.occu** | **0.937** | **0.139** | **12** | **6.77** | **0.0003** |
|  |  | bFD.index.biovol - mFD.index | **0.222** | **0.145** | **12** | **1.53** | **0.7237** |
|  |  | **bFD.index.biovol - sp.biovol** | **-0.572** | **0.163** | **12** | **-3.50** | **0.0499** |
|  |  | bFD.index.biovol - sp.occu | -0.010 | 0.149 | 12 | -0.07 | 1 |
|  |  | **bFD.index.occu - FG.biovol** | **-1.517** | **0.148** | **12** | **-10.26** | **<.0001** |
|  |  | bFD.index.occu - FG.occu | -0.193 | 0.127 | 12 | -1.53 | 0.7267 |
|  |  | **bFD.index.occu - mFD.index** | **-0.908** | **0.134** | **12** | **-6.80** | **0.0003** |
|  |  | **bFD.index.occu - sp.biovol** | **-1.702** | **0.154** | **12** | **-11.07** | **<.0001** |
|  |  | **bFD.index.occu - sp.occu** | **-1.140** | **0.138** | **12** | **-8.27** | **<.0001** |
|  |  | **FG.biovol - FG.occu** | **1.324** | **0.148** | **12** | **8.93** | **<.0001** |
|  |  | **FG.biovol - mFD.index** | **0.608** | **0.154** | **12** | **3.95** | **0.0238** |
|  |  | FG.biovol - sp.biovol | -0.186 | 0.172 | 12 | -1.08 | 0.9219 |
|  |  | FG.biovol - sp.occu | 0.376 | 0.158 | 12 | 2.38 | 0.2831 |
|  |  | **FG.occu - mFD.index** | **-0.715** | **0.134** | **12** | **-5.34** | **0.0025** |
|  |  | **FG.occu - sp.biovol** | **-1.509** | **0.154** | **12** | **-9.79** | **<.0001** |
|  |  | **FG.occu - sp.occu** | **-0.947** | **0.138** | **12** | **-6.85** | **0.0003** |
|  |  | **mFD.index - sp.biovol** | **-0.794** | **0.16** | **12** | **-4.97** | **0.0045** |
|  |  | mFD.index - sp.occu | -0.232 | 0.145 | 12 | -1.60 | 0.684 |
|  |  | **sp.biovol - sp.occu** | 0.562 | 0.163 | 12 | 3.44 | 0.0553 |
|  |  |  |  |  |  |  |  |
|  | Turnover | bFD.index.biovol - bFD.index.occu | **-0.668** | **0.146** | **12** | **-4.59** | **0.0082** |
|  |  | **bFD.index.biovol - FG.biovol** | **-1.917** | **0.141** | **12** | **-13.62** | **<.0001** |
|  |  | **bFD.index.biovol - FG.occu** | **-1.237** | **0.141** | **12** | **-8.79** | **<.0001** |
|  |  | **bFD.index.biovol - mFD.index** | **-1.396** | **0.14** | **12** | **-9.97** | **<.0001** |
|  |  | **bFD.index.biovol - sp.biovol** | **-2.397** | **0.144** | **12** | **-16.62** | **<.0001** |
|  |  | **bFD.index.biovol - sp.occu** | **-2.370** | **0.144** | **12** | **-16.50** | **<.0001** |
|  |  | **bFD.index.occu - FG.biovol** | **-1.249** | **0.125** | **12** | **-9.96** | **<.0001** |
|  |  | bFD.index.occu - FG.occu | **-0.569** | **0.125** | **12** | **-4.54** | **0.009** |
|  |  | **bFD.index.occu - mFD.index** | **-0.728** | **0.125** | **12** | **-5.84** | **0.0011** |
|  |  | **bFD.index.occu - sp.biovol** | **-1.730** | **0.129** | **12** | **-13.40** | **<.0001** |
|  |  | **bFD.index.occu - sp.occu** | **-1.702** | **0.129** | **12** | **-13.24** | **<.0001** |
|  |  | **FG.biovol - FG.occu** | **0.680** | **0.12** | **12** | **5.68** | **0.0015** |
|  |  | FG.biovol - mFD.index | **0.521** | **0.119** | **12** | **4.39** | **0.0115** |
|  |  | FG.biovol - sp.biovol | **-0.481** | **0.123** | **12** | **-3.89** | **0.026** |
|  |  | FG.biovol - sp.occu | **-0.453** | **0.123** | **12** | **-3.69** | **0.0366** |
|  |  | FG.occu - mFD.index | -0.159 | 0.119 | 12 | -1.34 | 0.8237 |
|  |  | **FG.occu - sp.biovol** | **-1.160** | **0.124** | **12** | **-9.39** | **<.0001** |
|  |  | **FG.occu - sp.occu** | **-1.133** | **0.123** | **12** | **-9.21** | **<.0001** |
|  |  | **mFD.index - sp.biovol** | **-1.002** | **0.123** | **12** | **-8.17** | **<.0001** |
|  |  | **mFD.index - sp.occu** | **-0.974** | **0.122** | **12** | **-7.98** | **0.0001** |
|  |  | sp.biovol - sp.occu | 0.027 | 0.127 | 12 | 0.22 | 1 |
|  |  |  |  |  |  |  |  |
|  | Richness Difference | **bFD.index.biovol - bFD.index.occu** | **1.178** | **0.254** | **12** | **4.64** | **0.0076** |
|  |  | **bFD.index.biovol - FG.biovol** | **1.151** | **0.253** | **12** | **4.55** | **0.0088** |
|  |  | **bFD.index.biovol - FG.occu** | **1.652** | **0.268** | **12** | **6.17** | **0.0007** |
|  |  | **bFD.index.biovol - mFD.index** | **1.290** | **0.259** | **12** | **4.98** | **0.0043** |
|  |  | **bFD.index.biovol - sp.biovol** | **1.529** | **0.262** | **12** | **5.83** | **0.0012** |
|  |  | **bFD.index.biovol - sp.occu** | **2.089** | **0.287** | **12** | **7.28** | **0.0001** |
|  |  | bFD.index.occu - FG.biovol | -0.027 | 0.257 | 12 | -0.11 | 1 |
|  |  | bFD.index.occu - FG.occu | 0.474 | 0.271 | 12 | 1.75 | 0.5987 |
|  |  | bFD.index.occu - mFD.index | 0.112 | 0.262 | 12 | 0.43 | 0.9993 |
|  |  | bFD.index.occu - sp.biovol | 0.351 | 0.266 | 12 | 1.32 | 0.8308 |
|  |  | **bFD.index.occu - sp.occu** | 0.911 | 0.289 | 12 | 3.15 | 0.0893 |
|  |  | **FG.biovol - FG.occu** | 0.501 | 0.27 | 12 | 1.86 | 0.5399 |
|  |  | FG.biovol - mFD.index | 0.139 | 0.261 | 12 | 0.53 | 0.9977 |
|  |  | FG.biovol - sp.biovol | 0.379 | 0.265 | 12 | 1.43 | 0.7768 |
|  |  | **FG.biovol - sp.occu** | 0.938 | 0.289 | 12 | 3.24 | 0.0761 |
|  |  | **FG.occu - mFD.index** | -0.362 | 0.275 | 12 | -1.32 | 0.8316 |
|  |  | FG.occu - sp.biovol | -0.123 | 0.279 | 12 | -0.44 | 0.9992 |
|  |  | FG.occu - sp.occu | 0.437 | 0.301 | 12 | 1.45 | 0.767 |
|  |  | **mFD.index - sp.biovol** | 0.240 | 0.27 | 12 | 0.89 | 0.9681 |
|  |  | **mFD.index - sp.occu** | 0.799 | 0.294 | 12 | 2.72 | 0.1737 |
|  |  | sp.biovol - sp.occu | 0.559 | 0.297 | 12 | 1.88 | 0.5249 |
|  |  |  |  |  |  |  |  |
| R2Adjust | Total | bFD.index.biovol - bFD.index.occu | -0.167 | 0.348 | 6 | -0.48 | 0.9983 |
|  |  | bFD.index.biovol - FG.biovol | -0.367 | 0.34 | 6 | -1.08 | 0.914 |
|  |  | bFD.index.biovol - FG.occu | -0.365 | 0.34 | 6 | -1.07 | 0.9157 |
|  |  | bFD.index.biovol - mFD.index | 0.229 | 0.37 | 6 | 0.62 | 0.9934 |
|  |  | bFD.index.biovol - sp.biovol | -0.002 | 0.357 | 6 | -0.01 | 1 |
|  |  | bFD.index.biovol - sp.occu | -0.126 | 0.35 | 6 | -0.36 | 0.9997 |
|  |  | bFD.index.occu - FG.biovol | -0.200 | 0.331 | 6 | -0.60 | 0.9941 |
|  |  | bFD.index.occu - FG.occu | -0.198 | 0.331 | 6 | -0.60 | 0.9943 |
|  |  | bFD.index.occu - mFD.index | 0.395 | 0.362 | 6 | 1.09 | 0.9101 |
|  |  | bFD.index.occu - sp.biovol | 0.164 | 0.348 | 6 | 0.47 | 0.9984 |
|  |  | bFD.index.occu - sp.occu | 0.041 | 0.342 | 6 | 0.12 | 1 |
|  |  | FG.biovol - FG.occu | 0.002 | 0.322 | 6 | 0.01 | 1 |
|  |  | FG.biovol - mFD.index | 0.595 | 0.354 | 6 | 1.68 | 0.6485 |
|  |  | FG.biovol - sp.biovol | 0.364 | 0.34 | 6 | 1.07 | 0.916 |
|  |  | FG.biovol - sp.occu | 0.241 | 0.333 | 6 | 0.72 | 0.9854 |
|  |  | FG.occu - mFD.index | 0.593 | 0.354 | 6 | 1.68 | 0.6512 |
|  |  | FG.occu - sp.biovol | 0.362 | 0.34 | 6 | 1.07 | 0.9177 |
|  |  | FG.occu - sp.occu | 0.239 | 0.333 | 6 | 0.72 | 0.9859 |
|  |  | mFD.index - sp.biovol | -0.231 | 0.37 | 6 | -0.62 | 0.993 |
|  |  | mFD.index - sp.occu | -0.355 | 0.364 | 6 | -0.97 | 0.9431 |
|  |  | sp.biovol - sp.occu | -0.124 | 0.35 | 6 | -0.35 | 0.9997 |
|  |  |  |  |  |  |  |  |
|  | Turnover | contrast | estimate | SE | df | t.ratio | p.value |
|  |  | bFD.index.biovol - bFD.index.occu | -0.612 | 0.261 | 6 | -2.35 | 0.3507 |
|  |  | **bFD.index.biovol - FG.biovol** | **-0.973** | **0.188** | **6** | **-5.17** | **0.0188** |
|  |  | bFD.index.biovol - FG.occu | -0.699 | 0.195 | 6 | -3.59 | 0.0917 |
|  |  | **bFD.index.biovol - mFD.index** | **-1.083** | **0.199** | **6** | **-5.44** | **0.0148** |
|  |  | **bFD.index.biovol - sp.biovol** | **-0.906** | **0.189** | **6** | **-4.78** | **0.0271** |
|  |  | **bFD.index.biovol - sp.occu** | **-1.082** | **0.186** | **6** | **-5.82** | **0.0105** |
|  |  | bFD.index.occu - FG.biovol | -0.360 | 0.234 | 6 | -1.54 | 0.7208 |
|  |  | bFD.index.occu - FG.occu | -0.087 | 0.24 | 6 | -0.36 | 0.9996 |
|  |  | bFD.index.occu - mFD.index | -0.471 | 0.243 | 6 | -1.93 | 0.5243 |
|  |  | bFD.index.occu - sp.biovol | -0.294 | 0.236 | 6 | -1.25 | 0.8534 |
|  |  | bFD.index.occu - sp.occu | -0.470 | 0.233 | 6 | -2.02 | 0.4842 |
|  |  | FG.biovol - FG.occu | 0.274 | 0.157 | 6 | 1.74 | 0.6199 |
|  |  | FG.biovol - mFD.index | -0.110 | 0.163 | 6 | -0.68 | 0.9894 |
|  |  | FG.biovol - sp.biovol | 0.066 | 0.151 | 6 | 0.44 | 0.9989 |
|  |  | FG.biovol - sp.occu | -0.110 | 0.146 | 6 | -0.75 | 0.9826 |
|  |  | FG.occu - mFD.index | -0.384 | 0.171 | 6 | -2.25 | 0.3867 |
|  |  | FG.occu - sp.biovol | -0.207 | 0.159 | 6 | -1.30 | 0.8307 |
|  |  | FG.occu - sp.occu | -0.383 | 0.155 | 6 | -2.48 | 0.3066 |
|  |  | mFD.index - sp.biovol | 0.177 | 0.165 | 6 | 1.07 | 0.9157 |
|  |  | mFD.index - sp.occu | 0.001 | 0.16 | 6 | 0.01 | 1 |
|  |  | sp.biovol - sp.occu | -0.176 | 0.148 | 6 | -1.19 | 0.8769 |
|  |  |  |  |  |  |  |  |
|  | Richness Difference | **bFD.index.occu - FG.biovol** | **1.760** | **0.1196** | **4** | **14.718** | **0.0006** |
|  |  | **bFD.index.occu - mFD.index** | **1.182** | **0.0975** | **4** | **12.123** | **0.0013** |
|  |  | **bFD.index.occu - sp.biovol** | **2.445** | **0.1582** | **4** | **15.453** | **0.0005** |
|  |  | **bFD.index.occu - sp.occu** | **2.259** | **0.1461** | **4** | **15.454** | **0.0005** |
|  |  | FG.biovol - mFD.index | -0.578 | 0.1421 | 4 | -4.068 | 0.0665 |
|  |  | FG.biovol - sp.biovol | 0.685 | 0.189 | 4 | 3.626 | 0.0947 |
|  |  | FG.biovol - sp.occu | 0.498 | 0.179 | 4 | 2.784 | 0.1961 |
|  |  | **mFD.index - sp.biovol** | **1.263** | **0.1759** | **4** | **7.184** | **0.0093** |
|  |  | **mFD.index - sp.occu** | **1.077** | **0.1651** | **4** | **6.521** | **0.0132** |
|  |  | sp.biovol - sp.occu | -0.187 | 0.2068 | 4 | -0.904 | 0.8825 |

**Table S4** Pairwise comparisons among dissimilarity measures for beta-diversity components and adjusted R² for the dry season. Results are based on estimated marginal means (emmeans) from GLMs (beta regression). Parameter indicates whether the response is beta-diversity values (“Diversity”) or environmental explanation (“R² Adjusted”). Estimate is the difference in marginal means (first minus second measure); SE = standard error; df = degrees of freedom; t.ratio = test statistic; p.value = p-values adjusted for multiple comparisons in emmeans. Significant differences (p < 0.05) are highlighted in bold.

| **Parameter** | **Beta diversity component** | **contrast** | **estimate** | **SE** | **df** | **t.ratio** | **p.value** |
| --- | --- | --- | --- | --- | --- | --- | --- |
| Diversity | Total | bFD.index.biovol - bFD.index.occu | **0.8521** | **0.167** | **12** | **5.093** | **0.0036** |
|  |  | bFD.index.biovol - FG.biovol | -0.3629 | 0.185 | 12 | -1.961 | 0.4819 |
|  |  | bFD.index.biovol - FG.occu | **0.7314** | **0.167** | **12** | **4.37** | **0.0118** |
|  |  | bFD.index.biovol - mFD.index | **0.7197** | **0.168** | **12** | **4.275** | **0.0138** |
|  |  | bFD.index.biovol - sp.biovol | -0.4814 | 0.188 | 12 | -2.554 | 0.2223 |
|  |  | bFD.index.biovol - sp.occu | -0.2412 | 0.182 | 12 | -1.329 | 0.8267 |
|  |  | bFD.index.occu - FG.biovol | **-1.215** | **0.177** | **12** | **-6.875** | **0.0003** |
|  |  | bFD.index.occu - FG.occu | -0.1207 | 0.158 | 12 | -0.765 | 0.9844 |
|  |  | bFD.index.occu - mFD.index | -0.1325 | 0.159 | 12 | -0.834 | 0.9761 |
|  |  | bFD.index.occu - sp.biovol | **-1.3336** | **0.18** | **12** | **-7.4** | **0.0001** |
|  |  | bFD.index.occu - sp.occu | **-1.0934** | **0.173** | **12** | **-6.324** | **0.0006** |
|  |  | FG.biovol - FG.occu | **1.0944** | **0.177** | **12** | **6.19** | **0.0007** |
|  |  | FG.biovol - mFD.index | **1.0826** | **0.178** | **12** | **6.092** | **0.0008** |
|  |  | FG.biovol - sp.biovol | -0.1185 | 0.197 | 12 | -0.603 | 0.9955 |
|  |  | FG.biovol - sp.occu | 0.1217 | 0.19 | 12 | 0.64 | 0.9938 |
|  |  | FG.occu - mFD.index | -0.0118 | 0.159 | 12 | -0.074 | 1 |
|  |  | FG.occu - sp.biovol | **-1.2129** | **0.18** | **12** | **-6.728** | **0.0003** |
|  |  | FG.occu - sp.occu | **-0.9727** | **0.173** | **12** | **-5.624** | **0.0016** |
|  |  | mFD.index - sp.biovol | **-1.2011** | **0.181** | **12** | **-6.629** | **0.0004** |
|  |  | mFD.index - sp.occu | **-0.9609** | **0.174** | **12** | **-5.525** | **0.0018** |
|  |  | sp.biovol - sp.occu | 0.2402 | 0.193 | 12 | 1.242 | 0.8647 |
|  |  |  |  |  |  |  |  |
|  | Turnover | bFD.index.biovol - bFD.index.occu | -0.667 | 0.246 | 12 | -2.714 | 0.1754 |
|  |  | **bFD.index.biovol - FG.biovol** | **-1.951** | **0.226** | **12** | **-8.637** | **<.0001** |
|  |  | **bFD.index.biovol - FG.occu** | **-1.406** | **0.23** | **12** | **-6.099** | **0.0008** |
|  |  | **bFD.index.biovol - mFD.index** | **-1.06** | **0.236** | **12** | **-4.498** | **0.0095** |
|  |  | **bFD.index.biovol - sp.biovol** | **-2.341** | **0.226** | **12** | **-10.369** | **<.0001** |
|  |  | **bFD.index.biovol - sp.occu** | **-2.591** | **0.228** | **12** | **-11.362** | **<.0001** |
|  |  | **bFD.index.occu - FG.biovol** | **-1.284** | **0.197** | **12** | **-6.512** | **0.0004** |
|  |  | **bFD.index.occu - FG.occu** | **-0.738** | **0.202** | **12** | **-3.649** | **0.0391** |
|  |  | bFD.index.occu - mFD.index | -0.393 | 0.208 | 12 | -1.893 | 0.5192 |
|  |  | **bFD.index.occu - sp.biovol** | **-1.673** | **0.197** | **12** | **-8.498** | **<.0001** |
|  |  | **bFD.index.occu - sp.occu** | **-1.923** | **0.2** | **12** | **-9.618** | **<.0001** |
|  |  | FG.biovol - FG.occu | 0.545 | 0.178 | 12 | 3.066 | 0.1015 |
|  |  | **FG.biovol - mFD.index** | **0.891** | **0.185** | **12** | **4.827** | **0.0056** |
|  |  | FG.biovol - sp.biovol | -0.39 | 0.171 | 12 | -2.273 | 0.3287 |
|  |  | **FG.biovol - sp.occu** | **-0.64** | **0.175** | **12** | **-3.665** | **0.038** |
|  |  | FG.occu - mFD.index | 0.345 | 0.19 | 12 | 1.816 | 0.5621 |
|  |  | **FG.occu - sp.biovol** | **-0.935** | **0.178** | **12** | **-5.263** | **0.0028** |
|  |  | **FG.occu - sp.occu** | **-1.185** | **0.181** | **12** | **-6.555** | **0.0004** |
|  |  | **mFD.index - sp.biovol** | **-1.28** | **0.184** | **12** | **-6.948** | **0.0002** |
|  |  | **mFD.index - sp.occu** | **-1.53** | **0.187** | **12** | **-8.169** | **<.0001** |
|  |  | sp.biovol - sp.occu | -0.25 | 0.174 | 12 | -1.435 | 0.7746 |
|  |  |  |  |  |  |  |  |
|  | Richness Difference | **bFD.index.biovol - bFD.index.occu** | **1.1781** | **0.254** | **12** | **4.64** | **0.0076** |
|  |  | **bFD.index.biovol - FG.biovol** | **1.1509** | **0.253** | **12** | **4.55** | **0.0088** |
|  |  | **bFD.index.biovol - FG.occu** | **1.6521** | **0.268** | **12** | **6.174** | **0.0007** |
|  |  | **bFD.index.biovol - mFD.index** | **1.2899** | **0.259** | **12** | **4.983** | **0.0043** |
|  |  | **bFD.index.biovol - sp.biovol** | **1.5294** | **0.262** | **12** | **5.832** | **0.0012** |
|  |  | **bFD.index.biovol - sp.occu** | **2.0887** | **0.287** | **12** | **7.282** | **0.0001** |
|  |  | bFD.index.occu - FG.biovol | -0.0272 | 0.257 | 12 | -0.106 | 1 |
|  |  | bFD.index.occu - FG.occu | 0.474 | 0.271 | 12 | 1.752 | 0.5987 |
|  |  | bFD.index.occu - mFD.index | 0.1118 | 0.262 | 12 | 0.427 | 0.9993 |
|  |  | bFD.index.occu - sp.biovol | 0.3513 | 0.266 | 12 | 1.32 | 0.8308 |
|  |  | bFD.index.occu - sp.occu | 0.9107 | 0.289 | 12 | 3.146 | 0.0893 |
|  |  | FG.biovol - FG.occu | 0.5012 | 0.27 | 12 | 1.855 | 0.5399 |
|  |  | FG.biovol - mFD.index | 0.139 | 0.261 | 12 | 0.532 | 0.9977 |
|  |  | FG.biovol - sp.biovol | 0.3785 | 0.265 | 12 | 1.431 | 0.7768 |
|  |  | FG.biovol - sp.occu | 0.9379 | 0.289 | 12 | 3.244 | 0.0761 |
|  |  | FG.occu - mFD.index | -0.3622 | 0.275 | 12 | -1.318 | 0.8316 |
|  |  | FG.occu - sp.biovol | -0.1227 | 0.279 | 12 | -0.44 | 0.9992 |
|  |  | FG.occu - sp.occu | 0.4367 | 0.301 | 12 | 1.45 | 0.767 |
|  |  | mFD.index - sp.biovol | 0.2395 | 0.27 | 12 | 0.886 | 0.9681 |
|  |  | mFD.index - sp.occu | 0.7988 | 0.294 | 12 | 2.721 | 0.1737 |
|  |  | sp.biovol - sp.occu | 0.5594 | 0.297 | 12 | 1.882 | 0.5249 |
|  |  |  |  |  |  |  |  |
|  |  |  |  |  |  |  |  |
| R2Adjust | Total | bFD.index.biovol - bFD.index.occu | 0.3481 | 0.222 | 6 | 1.568 | 0.7056 |
|  |  | bFD.index.biovol - FG.biovol | 0.5552 | 0.229 | 6 | 2.421 | 0.3251 |
|  |  | bFD.index.biovol - FG.occu | 0.7654 | 0.267 | 6 | 2.863 | 0.2025 |
|  |  | bFD.index.biovol - mFD.index | 0.3666 | 0.223 | 6 | 1.646 | 0.6662 |
|  |  | bFD.index.biovol - sp.biovol | 0.423 | 0.225 | 6 | 1.884 | 0.5483 |
|  |  | bFD.index.biovol - sp.occu | 0.5384 | 0.229 | 6 | 2.354 | 0.3482 |
|  |  | bFD.index.occu - FG.biovol | 0.207 | 0.218 | 6 | 0.948 | 0.9492 |
|  |  | bFD.index.occu - FG.occu | 0.4173 | 0.258 | 6 | 1.618 | 0.6804 |
|  |  | bFD.index.occu - mFD.index | 0.0184 | 0.211 | 6 | 0.087 | 1 |
|  |  | bFD.index.occu - sp.biovol | 0.0748 | 0.213 | 6 | 0.351 | 0.9997 |
|  |  | bFD.index.occu - sp.occu | 0.1903 | 0.218 | 6 | 0.874 | 0.9644 |
|  |  | FG.biovol - FG.occu | 0.2102 | 0.264 | 6 | 0.796 | 0.9768 |
|  |  | FG.biovol - mFD.index | -0.1886 | 0.219 | 6 | -0.862 | 0.9666 |
|  |  | FG.biovol - sp.biovol | -0.1322 | 0.221 | 6 | -0.599 | 0.9943 |
|  |  | FG.biovol - sp.occu | -0.0167 | 0.225 | 6 | -0.074 | 1 |
|  |  | FG.occu - mFD.index | -0.3988 | 0.258 | 6 | -1.544 | 0.7176 |
|  |  | FG.occu - sp.biovol | -0.3424 | 0.26 | 6 | -1.317 | 0.8243 |
|  |  | FG.occu - sp.occu | -0.227 | 0.264 | 6 | -0.861 | 0.9667 |
|  |  | mFD.index - sp.biovol | 0.0564 | 0.214 | 6 | 0.264 | 0.9999 |
|  |  | mFD.index - sp.occu | 0.1719 | 0.218 | 6 | 0.788 | 0.9779 |
|  |  | sp.biovol - sp.occu | 0.1155 | 0.22 | 6 | 0.524 | 0.9972 |
|  |  |  |  |  |  |  |  |
|  | Turnover | bFD.index.biovol - bFD.index.occu | -0.307 | 0.516 | 6 | -0.595 | 0.9945 |
|  |  | bFD.index.biovol - FG.biovol | -0.8326 | 0.519 | 6 | -1.605 | 0.6869 |
|  |  | bFD.index.biovol - FG.occu | -0.2914 | 0.561 | 6 | -0.519 | 0.9973 |
|  |  | bFD.index.biovol - mFD.index | -0.8661 | 0.486 | 6 | -1.782 | 0.5981 |
|  |  | bFD.index.biovol - sp.biovol | -0.9556 | 0.482 | 6 | -1.982 | 0.502 |
|  |  | bFD.index.biovol - sp.occu | -0.9556 | 0.482 | 6 | -1.982 | 0.502 |
|  |  | bFD.index.occu - FG.biovol | -0.5255 | 0.432 | 6 | -1.215 | 0.8663 |
|  |  | bFD.index.occu - FG.occu | 0.0156 | 0.483 | 6 | 0.032 | 1 |
|  |  | bFD.index.occu - mFD.index | -0.5591 | 0.393 | 6 | -1.424 | 0.7757 |
|  |  | bFD.index.occu - sp.biovol | -0.6486 | 0.388 | 6 | -1.672 | 0.6531 |
|  |  | bFD.index.occu - sp.occu | -0.6486 | 0.388 | 6 | -1.672 | 0.6531 |
|  |  | FG.biovol - FG.occu | 0.5412 | 0.485 | 6 | 1.116 | 0.902 |
|  |  | FG.biovol - mFD.index | -0.0336 | 0.394 | 6 | -0.085 | 1 |
|  |  | FG.biovol - sp.biovol | -0.123 | 0.389 | 6 | -0.316 | 0.9998 |
|  |  | FG.biovol - sp.occu | -0.123 | 0.389 | 6 | -0.316 | 0.9998 |
|  |  | FG.occu - mFD.index | -0.5747 | 0.45 | 6 | -1.278 | 0.8408 |
|  |  | FG.occu - sp.biovol | -0.6642 | 0.445 | 6 | -1.491 | 0.7433 |
|  |  | FG.occu - sp.occu | -0.6642 | 0.445 | 6 | -1.491 | 0.7433 |
|  |  | mFD.index - sp.biovol | -0.0895 | 0.344 | 6 | -0.26 | 0.9999 |
|  |  | mFD.index - sp.occu | -0.0895 | 0.344 | 6 | -0.26 | 0.9999 |
|  |  | sp.biovol - sp.occu | 0 | 0.339 | 6 | 0 | 1 |
|  |  |  |  |  |  |  |  |
|  | Richness Difference | bFD.index.biovol - bFD.index.occu | 0.4912 | 0.427 | 6 | 1.151 | 0.89 |
|  |  | bFD.index.biovol - FG.biovol | 1.8907 | 0.576 | 6 | 3.282 | 0.1282 |
|  |  | bFD.index.biovol - FG.occu | 2.1168 | 0.805 | 6 | 2.631 | 0.2603 |
|  |  | bFD.index.biovol - mFD.index | 1.0985 | 0.478 | 6 | 2.298 | 0.369 |
|  |  | bFD.index.biovol - sp.biovol | 1.6499 | 0.543 | 6 | 3.037 | 0.1674 |
|  |  | bFD.index.biovol - sp.occu | 1.9493 | 0.77 | 6 | 2.531 | 0.2896 |
|  |  | bFD.index.occu - FG.biovol | 1.3995 | 0.593 | 6 | 2.361 | 0.346 |
|  |  | bFD.index.occu - FG.occu | 1.6256 | 0.816 | 6 | 1.991 | 0.4974 |
|  |  | bFD.index.occu - mFD.index | 0.6073 | 0.5 | 6 | 1.216 | 0.866 |
|  |  | bFD.index.occu - sp.biovol | 1.1587 | 0.561 | 6 | 2.064 | 0.4647 |
|  |  | bFD.index.occu - sp.occu | 1.4581 | 0.783 | 6 | 1.863 | 0.5584 |
|  |  | FG.biovol - FG.occu | 0.2261 | 0.893 | 6 | 0.253 | 1 |
|  |  | FG.biovol - mFD.index | -0.7922 | 0.627 | 6 | -1.263 | 0.8472 |
|  |  | FG.biovol - sp.biovol | -0.2409 | 0.673 | 6 | -0.358 | 0.9997 |
|  |  | FG.biovol - sp.occu | 0.0586 | 0.864 | 6 | 0.068 | 1 |
|  |  | FG.occu - mFD.index | -1.0182 | 0.841 | 6 | -1.211 | 0.868 |
|  |  | FG.occu - sp.biovol | -0.4669 | 0.875 | 6 | -0.534 | 0.9969 |
|  |  | FG.occu - sp.occu | -0.1675 | 1.029 | 6 | -0.163 | 1 |
|  |  | mFD.index - sp.biovol | 0.5513 | 0.598 | 6 | 0.921 | 0.9552 |
|  |  | mFD.index - sp.occu | 0.8507 | 0.809 | 6 | 1.052 | 0.9223 |
|  |  | sp.biovol - sp.occu | 0.2994 | 0.845 | 6 | 0.354 | 0.9997 |
|  |  | sp.biovol - sp.occu | 0.2994 | 0.845 | 6 | 0.354 | 0.9997 |
